# Supplementary material for: Hemoglobin Targets for Chronic Kidney Disease Patients with Anemia: A Systematic Review and Meta-analysis
Source: PLOS journal article supplement (doi:10.1371/journal.pone.0043655), 2012-08-30

**Figure S1. Effect of high versus low Hb targets on hypertension in patients with CKD.**

### S1.1 High Hb versus Low Hb targets (both group treated with ESAs)

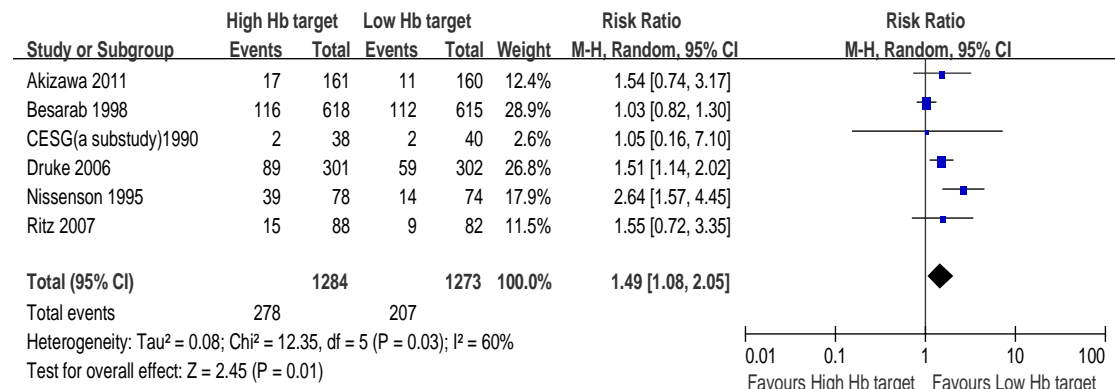

### S1.2 ESAs treatment versus no ESAs treatment

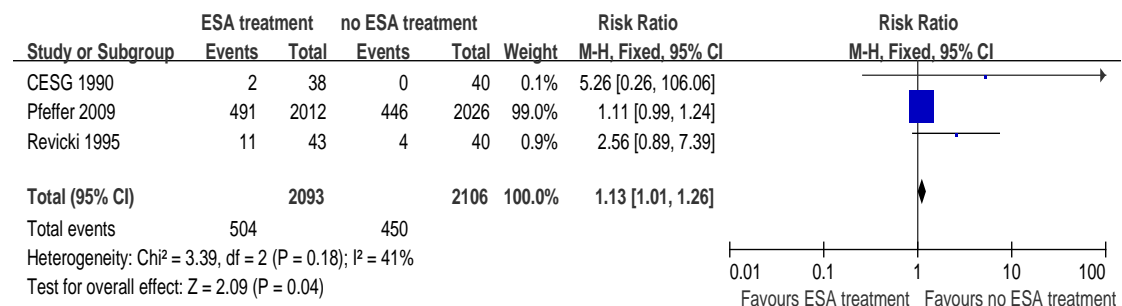

### S1.3 Summary of the high Hb versus low Hb group (irrespective of treatment modality)

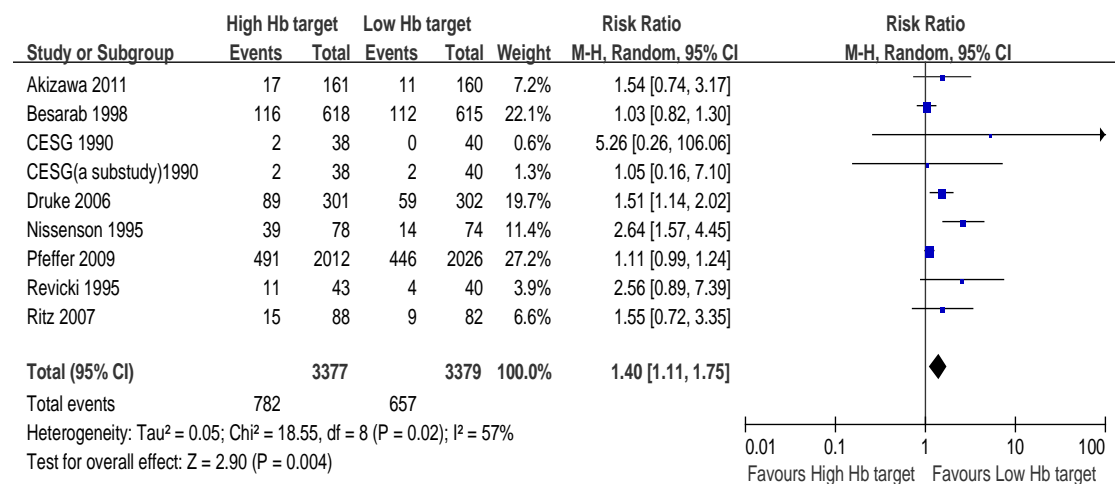

Supplement: S1 (10.1371/journal.pone.0043655.s001) [file journal.pone.0043655.s001]
