# Supplementary material for: Hemoglobin Targets for Chronic Kidney Disease Patients with Anemia: A Systematic Review and Meta-analysis
Source: PLOS journal article supplement (doi:10.1371/journal.pone.0043655), 2012-08-30

**Figure S2 Effect of high versus low Hb targets on stroke in patients with CKD.**

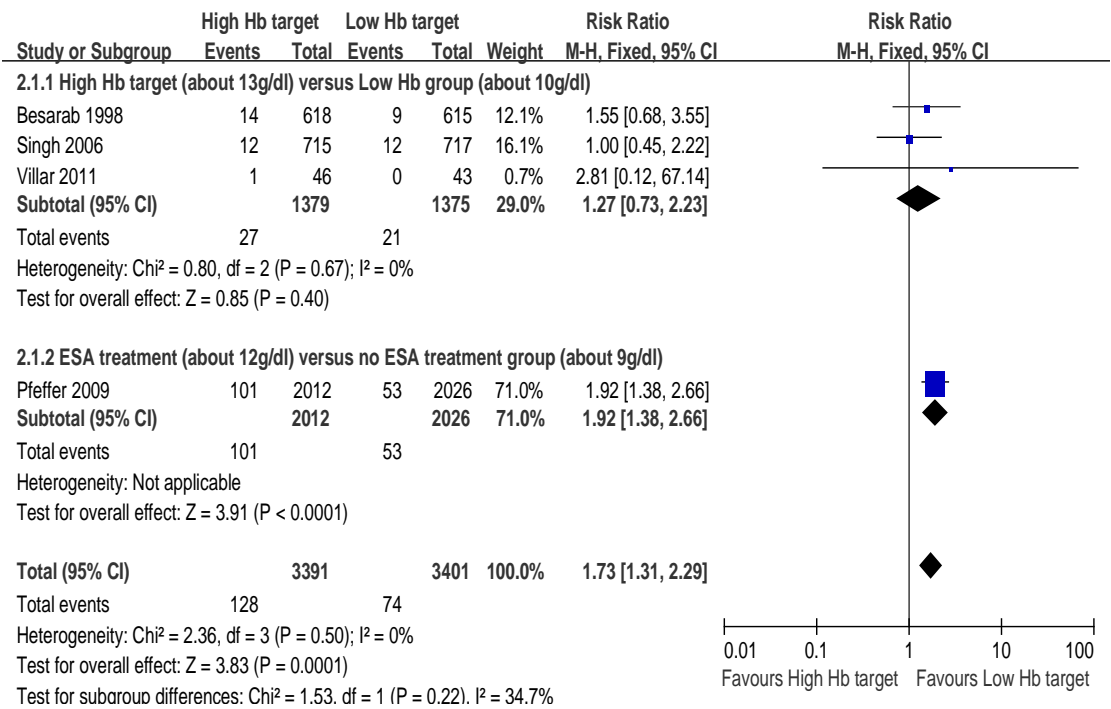

Supplement: S2 (10.1371/journal.pone.0043655.s002) [file journal.pone.0043655.s002]
