# Supplementary material for: Hemoglobin Targets for Chronic Kidney Disease Patients with Anemia: A Systematic Review and Meta-analysis
Source: PLOS journal article supplement (doi:10.1371/journal.pone.0043655), 2012-08-30

**Figure S3 Effect of high versus low Hb targets on non-fatal myocardial infarction in patients with CKD.**

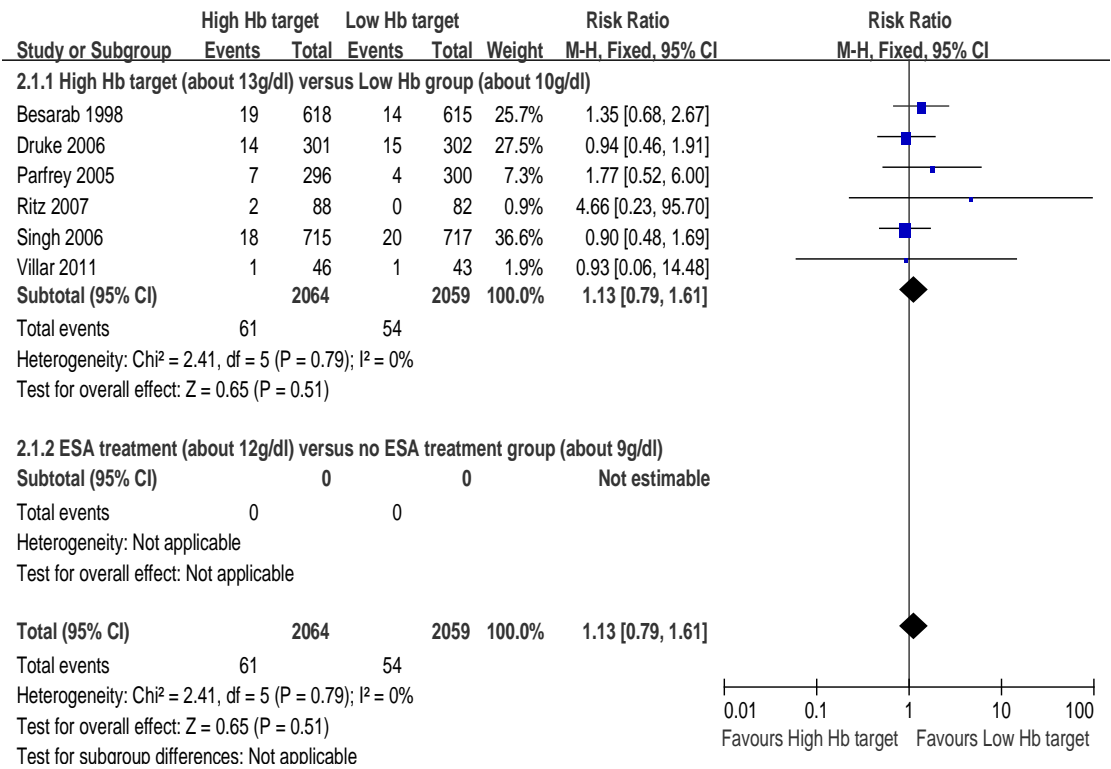

Supplement: S3 (10.1371/journal.pone.0043655.s003) [file journal.pone.0043655.s003]
