# Supplementary material for: Hemoglobin Targets for Chronic Kidney Disease Patients with Anemia: A Systematic Review and Meta-analysis
Source: PLOS journal article supplement (doi:10.1371/journal.pone.0043655), 2012-08-30
Supplement: S6 (10.1371/journal.pone.0043655.s006) [file journal.pone.0043655.s006]

## **Table S1. Search Strategy**

### **Medline**

- #1.Kidney Diseases/exp
- #2.Kidney Failure, Chronic/exp
- #3.Renal Insufficiency/exp
- #4.Uremia/exp
- #5.Renal Dialysis/exp
- #6.Dialysis/exp
- #7.Peritoneal Dialysis/exp
- #8.Hemodialysis, Home/exp
- #9.Hematinics/exp
- #10.Anemia/exp
- #11.(#1 or #2 or #3 or #4 or #5 or #6 or #7 or #8)
- #12.(#9 and #10 and #11)

### **Embase**

- #1. Chronic kidney disease/exp
- #2. Kidney failure/exp
- #3.Chronic kidney failure/exp
- #4.kidney disease/exp
- #5.Uremia/exp
- #6.Dialysis/exp
- #7.Continuous ambulatory peritoneal dialysis/exp
- #8.hemodialysis/exp
- #9.Renal replacement therapy/exp
- #10.Peritoneal dialysis/exp
- #11.Equilibrium dialysis/exp
- #12.Extended daily dialysis/exp
- #13.anemia/exp
- #14.Erythropoiesis stimulating and agents/exp
- #15.(#1 or #2 or #3 or #4 or #5 or #6 or #7 or #8 or #9 or #10 or #11 or #12)

#16.(#13 and #14 and #15)

**The Cochrane Database of Systematic Reviews**

#1.Renal Insufficiency, Chronic/exp

#2.Renal Replacement Therapy/exp

#3.Renal Insufficiency/exp

#4.Kidney Failure, Chronic/exp

#5.Renal Dialysis/exp

#6.Hemodialysis, Home/exp

#7.Uremia/exp

#8.Peritoneal Dialysis, Continuous Ambulatory/exp

#9.Dialysis/exp

#10.Peritoneal Dialysis/exp

#11.Anemia/exp

#12.Hematinics/exp

#13.(#1 or #2 or #3 or #4 or #5 or #6 or #7 or #8 or #9 or #10)

#14.(#12 and #13)
