# Supplementary material for: Hemoglobin Targets for Chronic Kidney Disease Patients with Anemia: A Systematic Review and Meta-analysis
Source: PLOS journal article supplement (doi:10.1371/journal.pone.0043655), 2012-08-30
Supplement: S9 (10.1371/journal.pone.0043655.s009) [file journal.pone.0043655.s009]

**Table S4. The quality of evidence and the strengths of recommendations.**

| Outcomes                        | Illustrative comparative risks* (95% CI) |                              | Relative effect<br>(95% CI) | No of Participants<br>(studies) | Quality of the evidence<br>(GRADE) |
|---------------------------------|------------------------------------------|------------------------------|-----------------------------|---------------------------------|------------------------------------|
|                                 | Assumed risk                             | Corresponding risk           |                             |                                 |                                    |
|                                 | Control                                  |                              |                             |                                 |                                    |
| Mortality                       | Study population                         |                              | RR 1.10                     | 9859                            | ⊕⊕⊕⊕                               |
|                                 | 138 per 1000                             | 152 per 1000<br>(138 to 167) | (1.00 to 1.21)              | (18 studies)                    | moderate                           |
|                                 | Moderate                                 |                              |                             |                                 |                                    |
|                                 |                                          |                              |                             |                                 |                                    |
| Hypertension                    | Study population                         |                              | RR 1.40                     | 6755                            | ⊕⊕⊕⊕                               |
|                                 | 61 per 1000                              | 86 per 1000<br>(69 to 107)   | (1.12 to 1.75)              | (8 studies)                     | moderate                           |
|                                 | Moderate                                 |                              |                             |                                 |                                    |
|                                 |                                          |                              |                             |                                 |                                    |
| Stroke                          | Study population                         |                              | RR 1.73                     | 6792                            | ⊕⊕⊕⊕                               |
|                                 | 22 per 1000                              | 39 per 1000<br>(29 to 51)    | (1.31 to 2.29)              | (4 studies)                     | high                               |
|                                 | Moderate                                 |                              |                             |                                 |                                    |
|                                 |                                          |                              |                             |                                 |                                    |
| Non-fatal myocardial infarction | Study population                         |                              | RR 1.13                     | 4122                            | ⊕⊕⊕⊕                               |
|                                 | 26 per 1000                              | 30 per 1000<br>(21 to 42)    | (0.79 to 1.62)              | (6 studies)                     | moderate                           |
|                                 | Moderate                                 |                              |                             |                                 |                                    |
|                                 |                                          |                              |                             |                                 |                                    |
| Renal Replacement Therapy       | Study population                         |                              | RR 1.00                     | 7298                            | ⊕⊕⊕⊕                               |
|                                 | 89 per 1000                              | 89 per 1000<br>(76 to 105)   | (0.85 to 1.18)              | (12 studies)                    | moderate                           |
|                                 | Moderate                                 |                              |                             |                                 |                                    |
|                                 |                                          |                              |                             |                                 |                                    |
| Hospitalizations                | Study population                         |                              | RR 1.07                     | 2753                            | ⊕⊕⊕⊕                               |
|                                 | 556 per 1000                             | 595 per 1000<br>(556 to 634) | (1.00 to 1.14)              | (3 studies)                     | moderate                           |
|                                 | Moderate                                 |                              |                             |                                 |                                    |
|                                 |                                          |                              |                             |                                 |                                    |
